# Supplementary material
Source: Elsevier journal article supplement (https://www.sciencedirect.com/science/article/pii/S2531043718300990)
Supplement: mmc1 [file S2531043718300990:mmc1.docx]

Pirfenidone

Nintedanib
